# Supplementary material for: Designing conservation strategies to preserve the genetic diversity of Astragalus edulis Bunge, an endangered species from western Mediterranean region
Source: PeerJ journal article supplement (doi:10.7717/peerj.1474), 2016-01-18
Supplement: Peas&al_Appendix_PeerJ.pdf [file Peas%26al_Appendix_PeerJ.pdf]

1 **Appendix 1.** Probabilities of loss of 273 rare alleles when all populations of *Astragalus edulis* are considered  
2 as one single management unit and preferred sampling area. N, number of populations where each allele  
3 was found; A<sub>N</sub> allele number; Geographical groups: IP=Iberian Peninsula; M=Morocco; CI=Canary Islands; L<sub>o</sub>,  
4 observed probability of loss of the allele; L<sub>e</sub>, expected probability of loss of the allele; PSA, preferred  
5 sampling area.  
6

| A <sub>N</sub> | N | IP | M | CI | L <sub>o</sub> | L <sub>e</sub> | PSA |
|----------------|---|----|---|----|----------------|----------------|-----|
| B3             | 3 | 1  | 2 | 0  | 0.95103016     | 0.98346744     | IP  |
| B8             | 3 | 1  | 0 | 2  | 0.93515798     | 0.97801577     | IP  |
| B12            | 1 | 1  | 0 | 0  | 0.98891975     | 0.98894859     | IP  |
| B13            | 3 | 2  | 1 | 0  | 0.95103016     | 0.98346744     | IP  |
| B16            | 3 | 3  | 0 | 0  | 0.95103016     | 0.98346744     | IP  |
| B18            | 3 | 0  | 3 | 0  | 0.93515798     | 0.97801577     | M   |
| B21            | 2 | 1  | 1 | 0  | 0.97796228     | 0.98894859     | IP  |
| B31            | 3 | 1  | 2 | 0  | 0.73509189     | 0.9047041      | IP  |
| B33            | 1 | 0  | 1 | 0  | 0.99445216     | 0.9944594      | M   |
| B37            | 2 | 1  | 1 | 0  | 0.97796228     | 0.98894859     | IP  |
| B40            | 1 | 0  | 0 | 1  | 0.98891975     | 0.98894859     | CI  |
| B44            | 2 | 0  | 1 | 1  | 0.96708102     | 0.98346744     | M   |
| B46            | 1 | 1  | 0 | 0  | 0.99445216     | 0.9944594      | IP  |
| B47            | 1 | 0  | 0 | 1  | 0.99445216     | 0.9944594      | CI  |
| B53            | 1 | 0  | 0 | 1  | 0.98891975     | 0.98894859     | CI  |
| B55            | 3 | 2  | 1 | 0  | 0.91950716     | 0.97259343     | IP  |
| B56            | 1 | 0  | 0 | 1  | 0.99445216     | 0.9944594      | CI  |
| B58            | 1 | 0  | 1 | 0  | 0.99445216     | 0.9944594      | M   |
| B66            | 2 | 1  | 1 | 0  | 0.97796228     | 0.98894859     | IP  |
| B67            | 3 | 0  | 0 | 3  | 0.90407522     | 0.96720029     | CI  |
| B68            | 1 | 0  | 1 | 0  | 0.99445216     | 0.9944594      | M   |
| B70            | 1 | 0  | 1 | 0  | 0.99445216     | 0.9944594      | M   |
| B72            | 3 | 0  | 3 | 0  | 0.95103016     | 0.98346744     | M   |
| B73            | 2 | 0  | 0 | 2  | 0.95629082     | 0.97801577     | CI  |

|      |   |   |   |   |            |            |    |
|------|---|---|---|---|------------|------------|----|
| B74  | 2 | 0 | 0 | 2 | 0.97796228 | 0.98894859 | CI |
| B81  | 1 | 0 | 0 | 1 | 0.98891975 | 0.98894859 | CI |
| B82  | 1 | 0 | 1 | 0 | 0.99445216 | 0.9944594  | M  |
| B83  | 1 | 0 | 0 | 1 | 0.99445216 | 0.9944594  | CI |
| B85  | 1 | 0 | 1 | 0 | 0.99445216 | 0.9944594  | M  |
| B87  | 1 | 0 | 0 | 1 | 0.99445216 | 0.9944594  | CI |
| B88  | 3 | 1 | 2 | 0 | 0.95103016 | 0.98346744 | IP |
| B89  | 2 | 2 | 0 | 0 | 0.97796228 | 0.98894859 | IP |
| B90  | 3 | 0 | 0 | 3 | 0.95103016 | 0.98346744 | CI |
| B91  | 1 | 1 | 0 | 0 | 0.99445216 | 0.9944594  | IP |
| B93  | 1 | 1 | 0 | 0 | 0.98891975 | 0.98894859 | IP |
| B94  | 1 | 0 | 0 | 1 | 0.99445216 | 0.9944594  | CI |
| B99  | 3 | 1 | 1 | 1 | 0.93515798 | 0.97801577 | IP |
| B100 | 1 | 0 | 0 | 1 | 0.99445216 | 0.9944594  | CI |
| B105 | 2 | 0 | 2 | 0 | 0.97796228 | 0.98894859 | M  |
| B107 | 1 | 1 | 0 | 0 | 0.99445216 | 0.9944594  | IP |
| B108 | 1 | 0 | 0 | 1 | 0.99445216 | 0.9944594  | CI |
| B109 | 2 | 1 | 1 | 0 | 0.96708102 | 0.98346744 | IP |
| B110 | 1 | 1 | 0 | 0 | 0.99445216 | 0.9944594  | IP |
| B111 | 2 | 2 | 0 | 0 | 0.97796228 | 0.98894859 | IP |
| B115 | 1 | 1 | 0 | 0 | 0.99445216 | 0.9944594  | IP |
| B119 | 2 | 2 | 0 | 0 | 0.97796228 | 0.98894859 | IP |
| B120 | 1 | 0 | 0 | 1 | 0.99445216 | 0.9944594  | CI |
| B125 | 3 | 0 | 3 | 0 | 0.84448757 | 0.94591649 | M  |
| B129 | 3 | 0 | 3 | 0 | 0.93515798 | 0.97801577 | M  |
| B130 | 1 | 0 | 0 | 1 | 0.98891975 | 0.98894859 | CI |
| B136 | 3 | 1 | 2 | 0 | 0.91950716 | 0.97259343 | IP |
| B139 | 2 | 0 | 1 | 1 | 0.96708102 | 0.98346744 | M  |
| B142 | 3 | 0 | 3 | 0 | 0.93515798 | 0.97801577 | M  |
| B146 | 1 | 0 | 1 | 0 | 0.99445216 | 0.9944594  | M  |
| B147 | 2 | 0 | 0 | 2 | 0.97796228 | 0.98894859 | CI |
| B150 | 3 | 1 | 2 | 0 | 0.91950716 | 0.97259343 | IP |

|      |   |   |   |   |            |            |    |
|------|---|---|---|---|------------|------------|----|
| B152 | 2 | 1 | 1 | 0 | 0.97796228 | 0.98894859 | IP |
| B157 | 1 | 0 | 1 | 0 | 0.99445216 | 0.9944594  | M  |
| B162 | 2 | 1 | 1 | 0 | 0.97796228 | 0.98894859 | IP |
| B166 | 2 | 0 | 2 | 0 | 0.97796228 | 0.98894859 | M  |
| B169 | 1 | 0 | 1 | 0 | 0.98891975 | 0.98894859 | M  |
| B171 | 3 | 1 | 2 | 0 | 0.76126463 | 0.91484074 | IP |
| B173 | 3 | 1 | 1 | 1 | 0.93515798 | 0.97801577 | IP |
| B174 | 2 | 1 | 1 | 0 | 0.97796228 | 0.98894859 | IP |
| B175 | 3 | 2 | 1 | 0 | 0.95103016 | 0.98346744 | IP |
| B176 | 1 | 1 | 0 | 0 | 0.99445216 | 0.9944594  | IP |
| B178 | 1 | 0 | 0 | 1 | 0.99445216 | 0.9944594  | CI |
| B179 | 1 | 0 | 1 | 0 | 0.99445216 | 0.9944594  | M  |
| B186 | 2 | 2 | 0 | 0 | 0.97796228 | 0.98894859 | IP |
| B187 | 2 | 0 | 1 | 1 | 0.96708102 | 0.98346744 | M  |
| B189 | 3 | 1 | 2 | 0 | 0.93515798 | 0.97801577 | IP |
| B190 | 3 | 1 | 2 | 0 | 0.95103016 | 0.98346744 | IP |
| B192 | 3 | 1 | 2 | 0 | 0.91950716 | 0.97259343 | IP |
| B193 | 2 | 0 | 2 | 0 | 0.96708102 | 0.98346744 | M  |
| B194 | 1 | 1 | 0 | 0 | 0.94521605 | 0.94591649 | IP |
| B196 | 2 | 1 | 1 | 0 | 0.97796228 | 0.98894859 | IP |
| B197 | 1 | 1 | 0 | 0 | 0.98891975 | 0.98894859 | IP |
| B198 | 1 | 1 | 0 | 0 | 0.99445216 | 0.9944594  | IP |
| B199 | 1 | 0 | 1 | 0 | 0.98891975 | 0.98894859 | M  |
| B200 | 2 | 0 | 2 | 0 | 0.97796228 | 0.98894859 | M  |
| B201 | 3 | 0 | 3 | 0 | 0.95103016 | 0.98346744 | M  |
| B202 | 1 | 0 | 1 | 0 | 0.99445216 | 0.9944594  | M  |
| B203 | 2 | 0 | 2 | 0 | 0.96708102 | 0.98346744 | M  |
| B205 | 2 | 0 | 2 | 0 | 0.97796228 | 0.98894859 | M  |
| B207 | 1 | 0 | 0 | 1 | 0.99445216 | 0.9944594  | CI |
| B208 | 1 | 0 | 1 | 0 | 0.99445216 | 0.9944594  | M  |
| B209 | 3 | 1 | 1 | 1 | 0.93515798 | 0.97801577 | IP |
| B210 | 1 | 0 | 1 | 0 | 0.9614892  | 0.96183617 | M  |

|      |   |   |   |   |            |            |    |
|------|---|---|---|---|------------|------------|----|
| B211 | 1 | 0 | 1 | 0 | 0.99445216 | 0.9944594  | M  |
| B212 | 3 | 3 | 0 | 0 | 0.78820936 | 0.92508757 | IP |
| B213 | 3 | 3 | 0 | 0 | 0.67292149 | 0.87983711 | IP |
| B214 | 1 | 0 | 0 | 1 | 0.99445216 | 0.9944594  | CI |
| B215 | 1 | 0 | 1 | 0 | 0.99445216 | 0.9944594  | M  |
| B217 | 2 | 0 | 2 | 0 | 0.97796228 | 0.98894859 | M  |
| B220 | 1 | 0 | 1 | 0 | 0.98891975 | 0.98894859 | M  |
| B221 | 2 | 0 | 2 | 0 | 0.88326639 | 0.94066698 | M  |
| B222 | 3 | 0 | 0 | 3 | 0.67292149 | 0.87983711 | CI |
| B223 | 2 | 0 | 2 | 0 | 0.97796228 | 0.98894859 | M  |
| B224 | 1 | 0 | 1 | 0 | 0.99445216 | 0.9944594  | M  |
| B225 | 3 | 0 | 2 | 1 | 0.90407522 | 0.96720029 | M  |
| B227 | 1 | 0 | 0 | 1 | 0.99445216 | 0.9944594  | CI |
| B228 | 1 | 0 | 1 | 0 | 0.99445216 | 0.9944594  | M  |
| B229 | 1 | 0 | 0 | 1 | 0.99445216 | 0.9944594  | CI |
| B230 | 2 | 0 | 2 | 0 | 0.88326639 | 0.94066698 | M  |
| B231 | 1 | 0 | 0 | 1 | 0.99445216 | 0.9944594  | CI |
| B232 | 2 | 0 | 2 | 0 | 0.84346366 | 0.91995031 | M  |
| B234 | 3 | 0 | 3 | 0 | 0.60416138 | 0.8508716  | M  |
| B236 | 1 | 0 | 1 | 0 | 0.98891975 | 0.98894859 | M  |
| B238 | 1 | 0 | 1 | 0 | 0.99445216 | 0.9944594  | M  |
| B239 | 1 | 1 | 0 | 0 | 0.92373457 | 0.92508757 | IP |
| B240 | 2 | 2 | 0 | 0 | 0.84346366 | 0.91995031 | IP |
| B243 | 1 | 0 | 0 | 1 | 0.99445216 | 0.9944594  | CI |
| B245 | 1 | 0 | 0 | 1 | 0.99445216 | 0.9944594  | CI |
| B251 | 3 | 0 | 0 | 3 | 0.90407522 | 0.96720029 | CI |
| B252 | 2 | 0 | 0 | 2 | 0.97796228 | 0.98894859 | CI |
| G5   | 2 | 1 | 1 | 0 | 0.97796228 | 0.98894859 | IP |
| G15  | 3 | 2 | 1 | 0 | 0.93515798 | 0.97801577 | IP |
| G17  | 2 | 2 | 0 | 0 | 0.95629082 | 0.97801577 | IP |
| G22  | 2 | 0 | 2 | 0 | 0.96708102 | 0.98346744 | M  |
| G24  | 1 | 0 | 0 | 1 | 0.99445216 | 0.9944594  | CI |

|      |   |   |   |   |            |            |    |
|------|---|---|---|---|------------|------------|----|
| G38  | 1 | 1 | 0 | 0 | 0.99445216 | 0.9944594  | IP |
| G41  | 1 | 0 | 1 | 0 | 0.99445216 | 0.9944594  | M  |
| G46  | 1 | 0 | 1 | 0 | 0.98891975 | 0.98894859 | M  |
| G53  | 2 | 1 | 1 | 0 | 0.80502156 | 0.89967675 | IP |
| G54  | 3 | 2 | 1 | 0 | 0.87385822 | 0.95650093 | IP |
| G55  | 1 | 0 | 1 | 0 | 0.95604938 | 0.95650093 | M  |
| G59  | 1 | 0 | 0 | 1 | 0.99445216 | 0.9944594  | CI |
| G65  | 1 | 0 | 1 | 0 | 0.98891975 | 0.98894859 | M  |
| G67  | 2 | 0 | 2 | 0 | 0.96708102 | 0.98346744 | M  |
| G69  | 3 | 0 | 0 | 3 | 0.73509189 | 0.9047041  | CI |
| G70  | 2 | 0 | 2 | 0 | 0.97796228 | 0.98894859 | M  |
| G71  | 3 | 0 | 3 | 0 | 0.70967335 | 0.89467652 | M  |
| G72  | 2 | 0 | 1 | 1 | 0.95629082 | 0.97801577 | M  |
| G73  | 3 | 2 | 0 | 1 | 0.88885972 | 0.96183617 | IP |
| G74  | 1 | 1 | 0 | 0 | 0.99445216 | 0.9944594  | IP |
| G76  | 2 | 0 | 2 | 0 | 0.74984107 | 0.87007719 | M  |
| G77  | 3 | 2 | 1 | 0 | 0.87385822 | 0.95650093 | IP |
| G78  | 1 | 0 | 0 | 1 | 0.99445216 | 0.9944594  | CI |
| G79  | 1 | 1 | 0 | 0 | 0.99445216 | 0.9944594  | IP |
| G80  | 2 | 1 | 1 | 0 | 0.97796228 | 0.98894859 | IP |
| G84  | 3 | 0 | 2 | 1 | 0.87385822 | 0.95650093 | M  |
| G87  | 2 | 1 | 1 | 0 | 0.97796228 | 0.98894859 | IP |
| G91  | 3 | 0 | 3 | 0 | 0.91950716 | 0.97259343 | M  |
| G92  | 2 | 1 | 1 | 0 | 0.97796228 | 0.98894859 | IP |
| G93  | 2 | 0 | 2 | 0 | 0.96708102 | 0.98346744 | M  |
| G94  | 3 | 0 | 3 | 0 | 0.84448757 | 0.94591649 | M  |
| G95  | 3 | 1 | 2 | 0 | 0.93515798 | 0.97801577 | IP |
| G108 | 2 | 0 | 2 | 0 | 0.97796228 | 0.98894859 | M  |
| G115 | 1 | 0 | 0 | 1 | 0.99445216 | 0.9944594  | CI |
| G116 | 2 | 0 | 2 | 0 | 0.97796228 | 0.98894859 | M  |
| G117 | 2 | 2 | 0 | 0 | 0.97796228 | 0.98894859 | IP |
| G127 | 1 | 0 | 1 | 0 | 0.99445216 | 0.9944594  | M  |

|      |   |   |   |   |            |            |    |
|------|---|---|---|---|------------|------------|----|
| G128 | 3 | 0 | 1 | 2 | 0.93515798 | 0.97801577 | M  |
| G129 | 3 | 0 | 2 | 1 | 0.93515798 | 0.97801577 | M  |
| G130 | 3 | 0 | 3 | 0 | 0.69724143 | 0.88970326 | M  |
| G135 | 1 | 0 | 1 | 0 | 0.99445216 | 0.9944594  | M  |
| G137 | 1 | 0 | 0 | 1 | 0.99445216 | 0.9944594  | CI |
| G138 | 1 | 0 | 1 | 0 | 0.99445216 | 0.9944594  | M  |
| G141 | 1 | 0 | 0 | 1 | 0.98891975 | 0.98894859 | CI |
| G143 | 1 | 1 | 0 | 0 | 0.99445216 | 0.9944594  | IP |
| G144 | 3 | 2 | 1 | 0 | 0.91950716 | 0.97259343 | IP |
| G147 | 1 | 0 | 0 | 1 | 0.98891975 | 0.98894859 | CI |
| G153 | 1 | 0 | 1 | 0 | 0.97790123 | 0.97801577 | M  |
| G154 | 2 | 0 | 1 | 1 | 0.97796228 | 0.98894859 | M  |
| G155 | 1 | 0 | 0 | 1 | 0.99445216 | 0.9944594  | CI |
| G157 | 3 | 0 | 3 | 0 | 0.76126463 | 0.91484074 | M  |
| G159 | 3 | 0 | 2 | 1 | 0.88885972 | 0.96183617 | M  |
| G160 | 1 | 0 | 1 | 0 | 0.98891975 | 0.98894859 | M  |
| G163 | 1 | 0 | 1 | 0 | 0.98891975 | 0.98894859 | M  |
| G164 | 3 | 0 | 1 | 2 | 0.90407522 | 0.96720029 | M  |
| G165 | 3 | 1 | 1 | 1 | 0.95103016 | 0.98346744 | IP |
| G175 | 2 | 1 | 1 | 0 | 0.97796228 | 0.98894859 | IP |
| G176 | 1 | 0 | 1 | 0 | 0.99445216 | 0.9944594  | M  |
| G177 | 2 | 0 | 0 | 2 | 0.97796228 | 0.98894859 | CI |
| G180 | 1 | 0 | 0 | 1 | 0.9614892  | 0.96183617 | CI |
| G184 | 3 | 0 | 2 | 1 | 0.95103016 | 0.98346744 | M  |
| G185 | 1 | 0 | 0 | 1 | 0.98891975 | 0.98894859 | CI |
| G187 | 1 | 0 | 0 | 1 | 0.99445216 | 0.9944594  | CI |
| G188 | 1 | 1 | 0 | 0 | 0.99445216 | 0.9944594  | IP |
| G191 | 1 | 1 | 0 | 0 | 0.99445216 | 0.9944594  | IP |
| G192 | 1 | 1 | 0 | 0 | 0.99445216 | 0.9944594  | IP |
| G193 | 1 | 0 | 0 | 1 | 0.98891975 | 0.98894859 | CI |
| G198 | 1 | 1 | 0 | 0 | 0.99445216 | 0.9944594  | IP |
| G199 | 2 | 0 | 2 | 0 | 0.96708102 | 0.98346744 | M  |

|      |   |   |   |   |            |            |    |
|------|---|---|---|---|------------|------------|----|
| G212 | 3 | 2 | 0 | 1 | 0.95103016 | 0.98346744 | IP |
| G214 | 3 | 3 | 0 | 0 | 0.93515798 | 0.97801577 | IP |
| G217 | 1 | 1 | 0 | 0 | 0.99445216 | 0.9944594  | IP |
| G218 | 1 | 1 | 0 | 0 | 0.97790123 | 0.97801577 | IP |
| G219 | 1 | 1 | 0 | 0 | 0.99445216 | 0.9944594  | IP |
| G220 | 1 | 0 | 0 | 1 | 0.98891975 | 0.98894859 | CI |
| G221 | 1 | 1 | 0 | 0 | 0.99445216 | 0.9944594  | IP |
| G222 | 1 | 0 | 0 | 1 | 0.99445216 | 0.9944594  | CI |
| G223 | 1 | 1 | 0 | 0 | 0.99445216 | 0.9944594  | IP |
| G224 | 1 | 0 | 0 | 1 | 0.99445216 | 0.9944594  | CI |
| G225 | 1 | 1 | 0 | 0 | 0.99445216 | 0.9944594  | IP |
| G226 | 1 | 0 | 1 | 0 | 0.98891975 | 0.98894859 | M  |
| G227 | 1 | 0 | 0 | 1 | 0.99445216 | 0.9944594  | CI |
| G228 | 3 | 1 | 2 | 0 | 0.95103016 | 0.98346744 | IP |
| G231 | 1 | 0 | 1 | 0 | 0.99445216 | 0.9944594  | M  |
| G233 | 2 | 0 | 2 | 0 | 0.95629082 | 0.97801577 | M  |
| G235 | 2 | 0 | 0 | 2 | 0.94559117 | 0.97259343 | CI |
| G236 | 2 | 0 | 2 | 0 | 0.96708102 | 0.98346744 | M  |
| G237 | 2 | 0 | 0 | 2 | 0.97796228 | 0.98894859 | CI |
| G240 | 1 | 0 | 1 | 0 | 0.98891975 | 0.98894859 | M  |
| G241 | 1 | 0 | 1 | 0 | 0.98891975 | 0.98894859 | M  |
| G244 | 2 | 0 | 2 | 0 | 0.87318642 | 0.93544576 | M  |
| G245 | 1 | 0 | 1 | 0 | 0.99445216 | 0.9944594  | M  |
| G247 | 1 | 0 | 1 | 0 | 0.99445216 | 0.9944594  | M  |
| G250 | 1 | 0 | 0 | 1 | 0.99445216 | 0.9944594  | CI |
| G252 | 2 | 0 | 1 | 1 | 0.96708102 | 0.98346744 | M  |
| G254 | 1 | 0 | 1 | 0 | 0.98891975 | 0.98894859 | M  |
| G255 | 1 | 0 | 0 | 1 | 0.99445216 | 0.9944594  | CI |
| G256 | 2 | 0 | 2 | 0 | 0.92446148 | 0.96183617 | M  |
| G259 | 2 | 1 | 1 | 0 | 0.97796228 | 0.98894859 | IP |
| G262 | 1 | 0 | 0 | 1 | 0.99445216 | 0.9944594  | CI |
| G263 | 1 | 0 | 0 | 1 | 0.99445216 | 0.9944594  | CI |

|      |   |   |   |   |            |            |    |
|------|---|---|---|---|------------|------------|----|
| G266 | 1 | 0 | 0 | 1 | 0.99445216 | 0.9944594  | CI |
| G269 | 1 | 0 | 0 | 1 | 0.99445216 | 0.9944594  | CI |
| G271 | 1 | 0 | 1 | 0 | 0.99445216 | 0.9944594  | M  |
| G272 | 1 | 0 | 1 | 0 | 0.98891975 | 0.98894859 | M  |
| Y19  | 2 | 1 | 1 | 0 | 0.97796228 | 0.98894859 | M  |
| Y110 | 1 | 0 | 1 | 0 | 0.98891975 | 0.98894859 | M  |
| Y143 | 1 | 1 | 0 | 0 | 0.99445216 | 0.9944594  | IP |
| Y217 | 3 | 3 | 0 | 0 | 0.95103016 | 0.98346744 | IP |
| Y221 | 3 | 3 | 0 | 0 | 0.91950716 | 0.97259343 | IP |
| Y246 | 3 | 0 | 0 | 3 | 0.93515798 | 0.97801577 | CI |
| Y275 | 2 | 0 | 0 | 2 | 0.97796228 | 0.98894859 | CI |
| Y302 | 3 | 3 | 0 | 0 | 0.93515798 | 0.97801577 | IP |
| Y314 | 3 | 1 | 2 | 0 | 0.95103016 | 0.98346744 | IP |
| Y328 | 2 | 1 | 1 | 0 | 0.96708102 | 0.98346744 | IP |
| Y349 | 2 | 2 | 0 | 0 | 0.94559117 | 0.97259343 | IP |
| Y362 | 3 | 3 | 0 | 0 | 0.93515798 | 0.97801577 | IP |
| Y368 | 2 | 2 | 0 | 0 | 0.94559117 | 0.97259343 | IP |
| Y372 | 3 | 2 | 1 | 0 | 0.95103016 | 0.98346744 | IP |
| Y390 | 3 | 1 | 2 | 0 | 0.91950716 | 0.97259343 | IP |
| Y391 | 3 | 3 | 0 | 0 | 0.93515798 | 0.97801577 | IP |
| Y392 | 1 | 1 | 0 | 0 | 0.99445216 | 0.9944594  | IP |
| Y400 | 3 | 3 | 0 | 0 | 0.93515798 | 0.97801577 | IP |
| Y404 | 3 | 1 | 0 | 2 | 0.93515798 | 0.97801577 | IP |
| Y409 | 1 | 1 | 0 | 0 | 0.98340278 | 0.98346744 | IP |
| Y419 | 3 | 3 | 0 | 0 | 0.91950716 | 0.97259343 | IP |
| Y425 | 1 | 0 | 0 | 1 | 0.97790123 | 0.97801577 | CI |
| Y431 | 3 | 2 | 1 | 0 | 0.93515798 | 0.97801577 | IP |
| Y441 | 3 | 3 | 0 | 0 | 0.95103016 | 0.98346744 | IP |
| Y444 | 2 | 2 | 0 | 0 | 0.95629082 | 0.97801577 | IP |
| Y453 | 3 | 2 | 1 | 0 | 0.93515798 | 0.97801577 | IP |
| Y455 | 3 | 3 | 0 | 0 | 0.88885972 | 0.96183617 | IP |
| Y458 | 3 | 3 | 0 | 0 | 0.95103016 | 0.98346744 | IP |

|      |   |   |   |   |            |            |    |
|------|---|---|---|---|------------|------------|----|
| Y465 | 2 | 2 | 0 | 0 | 0.96708102 | 0.98346744 | IP |
| Y466 | 3 | 3 | 0 | 0 | 0.95103016 | 0.98346744 | IP |
| Y467 | 3 | 2 | 1 | 0 | 0.93515798 | 0.97801577 | IP |
| Y477 | 3 | 2 | 1 | 0 | 0.90407522 | 0.96720029 | IP |
| Y495 | 1 | 1 | 0 | 0 | 0.99445216 | 0.9944594  | IP |
| Y496 | 1 | 0 | 1 | 0 | 0.99445216 | 0.9944594  | M  |
| Y507 | 2 | 2 | 0 | 0 | 0.96708102 | 0.98346744 | IP |
| Y517 | 3 | 2 | 1 | 0 | 0.93515798 | 0.97801577 | IP |
| Y518 | 3 | 2 | 1 | 0 | 0.93515798 | 0.97801577 | IP |
| Y527 | 3 | 3 | 0 | 0 | 0.93515798 | 0.97801577 | IP |
| Y531 | 3 | 2 | 0 | 1 | 0.90407522 | 0.96720029 | IP |
| Y537 | 2 | 2 | 0 | 0 | 0.94559117 | 0.97259343 | IP |
| Y539 | 2 | 2 | 0 | 0 | 0.97796228 | 0.98894859 | IP |
| Y542 | 3 | 1 | 1 | 1 | 0.93515798 | 0.97801577 | IP |
| Y545 | 3 | 2 | 1 | 0 | 0.93515798 | 0.97801577 | IP |
| Y547 | 3 | 2 | 1 | 0 | 0.93515798 | 0.97801577 | IP |
| Y551 | 2 | 2 | 0 | 0 | 0.97796228 | 0.98894859 | IP |
| Y562 | 3 | 2 | 0 | 1 | 0.95103016 | 0.98346744 | IP |
| Y568 | 3 | 3 | 0 | 0 | 0.95103016 | 0.98346744 | IP |
| Y579 | 3 | 2 | 1 | 0 | 0.90407522 | 0.96720029 | IP |
| Y592 | 2 | 2 | 0 | 0 | 0.92446148 | 0.96183617 | IP |
| Y601 | 3 | 3 | 0 | 0 | 0.90407522 | 0.96720029 | IP |
| Y603 | 3 | 2 | 0 | 1 | 0.95103016 | 0.98346744 | IP |
| Y617 | 2 | 2 | 0 | 0 | 0.95629082 | 0.97801577 | IP |
| Y619 | 3 | 3 | 0 | 0 | 0.91950716 | 0.97259343 | IP |
